# Supplementary material
Source: Research Square preprint supplement (doi:10.21203/rs.3.rs-9917620/v1)
Supplement: Supplementary file 1 [file 4fa74e9f2683dc25359a789e.docx]

**Table 3**. Concentration of phenolic bioactives in microalgal extracts (mg mL-1).

| Samples | AP | AE | AG | AS | CS | CQ | VL | AT | NG | APC | ACL | | AC | AF | AS | RT | QT | KP |
| --- | --- | --- | --- | --- | --- | --- | --- | --- | --- | --- | --- | --- | --- | --- | --- | --- | --- | --- |
| *K. lunaris* | 2.16 | 8.79 | <LQ | 1.35 | 1.52 | 1.93 | 1.42 | 1.28 | 1.49 | 1.04 | <LQ | <LQ | | <LQ | <LQ | <LQ | 4.65 | 10.50 |
| *C. neogracilis* | 6.15 | 7.02 | 19.36 | 1.43 | 1.20 | 2.11 | 1.59 | 1.15 | 1.16 | 7.45 | <LQ | <LQ | | <LQ | <LQ | <LQ | 1.12 | 18.18 |
| *A. falcatus* | 4.17 | 7.74 | <LQ | 4.27 | 1.11 | 2.86 | 1.19 | 2.32 | 1.25 | 3.03 | <LQ | <LQ | | <LQ | <LQ | 1.77 | 1.27 | 9.97 |
| *D. brasiliensis* | 2.65 | 5.86 | 294.20 | 4.37 | 10.79 | 6.82 | 5.84 | 4.93 | 3.31 | 9.50 | <LQ | <LQ | | <LQ | <LQ | 1.87 | 1.35 | 8.83 |
| *D. tertiolecta* | 46.41 | 20.35 | 366.97 | 65.53 | 44.50 | 1.82 | 13.76 | 11.88 | 10.91 | 18.70 | 3.20 | 2.56 | | 3.85 | 2.45 | 6.75 | 2.88 | 105.60 |
| *T. gracilis* | <LQ* | 15.62 | <LQ | <LQ | 3.26 | 1.31 | 1.84 | 8.70 | 8.90 | 12.60 | <LQ | <LQ | | 1.84 | 1.26 | 3.01 | 7.56 | 3.04 |

AP: protocatechuic acid; AE: ellagic acid; AG: gallic acid; AS: syringic acid; CS: chrysin; CQ: catechin; VL: vanillin; TA: transcinnamic acid; NG: narigenin; APC: p-coumaric acid; ACL: chlorogenic acid; AC: caffeic acid; FA: ferulic acid; AS: sinapic acid; RT: rutin; QT: quercetin and KP: kaempferol.

*LQ (mg mL-1): AP (1.28); AG (3.15); AS (0.88); ACL (1.12); AC (0.98); AF (0.79); AS (0.65); RT (1.06).
