# Supplementary material
Source: Research Square preprint supplement (doi:10.21203/rs.3.rs-9917620/v1)
Supplement: Supplementary file 2 [file cc54ff8d3cef794b2ddccafa.docx]

**Table 1.** Wavelengths and retention times of phenolic acid and flavonoid patterns.

| Analyte | Wavelength (nm) | Retention time (min) |
| --- | --- | --- |
| Gallic acid | 272 | 7.01 |
| Protocatechuic acid | 260 | 10.30 |
| Catechin | 280 | 13.51 |
| Chlorogenic acid | 330 | 15.48 |
| Caffeic acid | 330 | 16.42 |
| Syringic acid | 272 | 17.95 |
| Vanillin | 280 | 18.95 |
| P-coumaric acid | 310 | 20.19 |
| Ferulic acid | 330 | 21.85 |
| Sinapic acid | 330 | 22.44 |
| Rutin | 360 | 25.35 |
| Ellagic acid | 260 | 26.33 |
| Transcinnamic acid | 280 | 29.63 |
| Naringenin | 280 | 30.35 |
| Quercetin | 360 | 30.84 |
| Kaempferol | 366 | 34.13 |
| Crysin | 272 | 39.83 |
