# Supplementary material
Source: Research Square preprint supplement (doi:10.21203/rs.3.rs-9917620/v1)
Supplement: Supplementary file 3 [file d42af6d94d1c7270b75b5016.docx]

**Table 2.** Median and IQR (interquartile range) values of MIC(mg mL-1) and MFC (mg mL-1), and MFC/MIC ratio of ethanolic extracts of microalgae against phytopathogens. The evaluated extract was considered with fungicidal (FC) or fungistatic (FT) activity according to the result obtained in the MFC/MIC ratio.

| **MICROALGAE** | **ACTIVITY** | **FUNGI** | | | |
| --- | --- | --- | --- | --- | --- |
| *C. fructicola* | *C. gloeosporioides* | *F. oxysporum* | *N. dimidiatum* |
| *Ankistrodesmus falcatus* | MIC  MFC  MFC/MIC  Activity | 0.375 (0)  0.375 (0)  1  FC | 6 (0)  6 (0)  1  FC | -  -  -  - | -  -  -  - |
| *Chaetoceros neogracilis* | MIC  MFC  MFC/MIC  Activity | 0.188 (0)  0.188 (0)  1  FC | 3 (0)  6 (0)  2  FC | -  -  -  - | -  -  -  - |
| *Desmodesmus brasiliensis* | MIC  MFC  MFC/MIC  Activity | 0.188 (0)  0.188 (0)  1  FC | 1.5 (0)  1.5 (0)  1  FC | -  -  -  - | -  -  -  - |
| *Dunaliella tertiolecta* | MIC  MFC  MFC/MIC  Activity | -  -  -  - | -  -  -  - | -  -  -  - | -  -  -  - |
| *Kirchnariella lunaris* | MIC  MFC  MFC/MIC  Activity | 0.047 (0)  0.047 (0)  1  FC | 0.75 (0)  1.5 (0)  2  FC | -  -  -  - | -  -  -  - |
| *Tetraselmis gracilis* | MIC  MFC  MFC/MIC  Activity | -  -  -  - | -  -  -  - | -  -  -  - | -  -  -  - |

(-): No inhibition.
